# Supplementary material for: Immunohistochemistry for Prostate Biopsy—Impact on Histological Prostate Cancer Diagnoses and Clinical Decision Making
Source: MDPI journal article supplement (doi:10.3390/curroncol28030197), 2021-06-09
Supplement: s1 [file s1]

## Article

# Immunohistochemistry for Prostate Biopsy—Impact on Histological Prostate Cancer Diagnoses and Clinical Decision Making

Philipp Mandel, Mike Wenzel, Benedikt Hoeh, Maria N. Welte, Felix Preisser, Tahir Inam, Clarissa Wittler, Clara Humke, Jens Köllermann, Peter Wild, Christoph Würnschimmel, Derya Tilki, Markus Graefen, Luis A. Kluth, Pierre I. Karakiewicz, Felix KH. Chun and Andreas Becker

## Supplementary Materials

**Table S1.** Descriptive analyses of 371 patients with positive prostate biopsy at University Hospital Frankfurt between 01/2017–06/2020, stratified according to the performance of immunohistochemistry (IHC). Abbreviations: PSA—prostate-specific antigen; DRE—digital rectal examination; GS—Gleason score.

| Variable                                     | -              | No IHC<br>N = 163 (43.9%) | IHC<br>N = 208 (56.1%) | p Value |
|----------------------------------------------|----------------|---------------------------|------------------------|---------|
| Age                                          | Median (IQR)   | 69 (63–75)                | 68 (62–73)             | 0.2     |
| Prostate volume                              | Median (IQR)   | 43 (30–62)                | 47 (37–70)             | 0.09    |
| PSA                                          | Median (IQR)   | 9.2 (5.7–29.6)            | 8.2 (5.9–12.9)         | 0.2     |
| Cores per biopsy                             | Median (IQR)   | 13 (12–14)                | 13 (12–14)             | 0.6     |
| Positive cores per biopsy                    | Median (IQR)   | 6 (4–10)                  | 5 (2–7)                | <0.01   |
| Percentage of positive cores                 | Median (IQR)   | 50 (30–80)                | 40 (20–60)             | <0.01   |
| Highest tumor infiltration per core          | Median (IQR)   | 70 (50–90)                | 50 (20–80)             | <0.01   |
| DRE                                          | Non-suspicious | 64 (39.3)                 | 115 (55.3)             | <0.01   |
|                                              | Suspicious     | 98 (60.1)                 | 86 (41.3)              |         |
| cT stage                                     | cT1            | 64 (39.3)                 | 114 (54.8)             | <0.01   |
|                                              | cT2            | 82 (50.3)                 | 74 (35.6)              |         |
|                                              | cT3–4          | 16 (9.8)                  | 12 (5.8)               |         |
| IHC                                          | Negative       | -                         | 23 (11.1)              |         |
|                                              | Positive       | -                         | 185 (88.9)             |         |
| IHC slides per biopsy                        | Median (IQR)   | -                         | 4 (2–5)                |         |
| IHC slides per biopsy, when IHC negative     | Median (IQR)   | -                         | 4 (2–6)                |         |
| IHC slides per biopsy, when IHC positive     | Median (IQR)   | -                         | 5 (5–7)                |         |
| Positive cores per biopsy, when IHC negative | Median (IQR)   | -                         | 5 (2–5)                |         |
| Positive cores per biopsy, when IHC positive | Median (IQR)   | -                         | 5 (2–7)                |         |
| Previous biopsies                            | Biopsy naive   | 135 (82.8)                | 161 (77.4)             | 0.3     |
|                                              | Repeat biopsy  | 28 (17.2)                 | 46 (22.1)              |         |
| Fusion biopsy                                | Yes            | 93 (57.1)                 | 126 (60.6)             | 0.5     |
|                                              | No             | 70 (42.9)                 | 82 (39.4)              |         |
| Gleason Score at biopsy                      | 6              | 8 (4.9)                   | 62 (29.8)              | <0.01   |
|                                              | 7              | 80 (49.1)                 | 80 (38.5)              |         |
|                                              | 8–10           | 73 (44.8)                 | 60 (28.8)              |         |
|                                              | Unknown GS     | 2 (1.2)                   | 6 (2.9)                |         |

**Table S2.** Descriptive analyses of 235 patients with negative prostate biopsy at University Hospital Frankfurt between 01/2017–06/2020, stratified according to the performance of immunohistochemistry (IHC). Abbreviations: PSA—prostate-specific antigen.

| Variable              | -             | No IHC<br>N = 93 (39.6%) | IHC<br>N = 142 (60.4%) | p Value |
|-----------------------|---------------|--------------------------|------------------------|---------|
| Age                   | Median (IQR)  | 63 (56–68)               | 63 (57–70)             | 0.4     |
| Prostate volume       | Median (IQR)  | 60 (40–77)               | 53 (40–76)             | 0.3     |
| PSA                   | Median (IQR)  | 7.4 (4.7–11.8)           | 6.5 (4.4–10.8)         | 0.4     |
| Cores per biopsy      | Median (IQR)  | 12 (12–14)               | 13 (12–14)             | 0.01    |
| IHC                   | Negative      | -                        | 142 (100)              |         |
|                       | Positive      | -                        | 0 (0)                  |         |
| IHC slides per biopsy | Median (IQR)  | -                        | 4 (2–6)                |         |
| Previous biopsies     | Biopsy naive  | 65 (69.9)                | 97 (68.3)              | 1       |
|                       | Repeat biopsy | 28 (30.1)                | 44 (31.0)              |         |
| Fusion biopsy         | Yes           | 38 (40.9)                | 85 (59.9)              | <0.01   |
|                       | No            | 55 (59.1)                | 56 (39.4)              |         |

**Table S3.** Descriptive analyses of 290 patients with positive prostate biopsy at University Hospital Frankfurt between 01/2017–06/2020, stratified according to the performance of immunohistochemistry (IHC) and no change in biopsy results due to IHC performance vs. no IHC performance. Abbreviations: PSA—prostate-specific antigen; DRE—digital rectal examination; GS: Gleason score.

| Variable                            | -              | IHC Positive/Negative and No Change in Biopsy Results<br>N = 127(43.8%) | No IHC Performed<br>N = 163 (56.2%) | p Value |
|-------------------------------------|----------------|-------------------------------------------------------------------------|-------------------------------------|---------|
| Age                                 | Median (IQR)   | 69 (63–74)                                                              | 69 (63–75)                          | 0.7     |
| Prostate volume                     | Median (IQR)   | 45 (36–60)                                                              | 43 (30–62)                          | 0.4     |
| PSA                                 | Median (IQR)   | 9.2 (6.6–20.2)                                                          | 9.2 (5.7–29.6)                      | 0.9     |
| Cores per biopsy                    | Median (IQR)   | 13 (12–14)                                                              | 13 (12–14)                          | 1       |
| Positive cores per biopsy           | Median (IQR)   | 6 (4–8)                                                                 | 6 (4–10)                            | 0.3     |
| Percentage of positive cores        | Median (IQR)   | 50 (30–70)                                                              | 50 (30–80)                          | 0.5     |
| Highest tumor infiltration per core | Median (IQR)   | 60 (40–80)                                                              | 70 (50–90)                          | <0.01   |
| IHC                                 | Positive       | 104 (81.9)                                                              | 0(0)                                |         |
|                                     | Negative       | 23 (18.1)                                                               | 0(0)                                |         |
|                                     | Not performed  | 0(0)                                                                    | 163 (100)                           |         |
| DRE                                 | Non-suspicious | 56 (44.1)                                                               | 64 (39.3)                           | 0.3     |
|                                     | Suspicious     | 64 (50.4)                                                               | 98 (60.1)                           |         |
| cT stage                            | cT1            | 56 (44.1)                                                               | 64 (39.3)                           | 0.5     |
|                                     | cT2            | 53 (41.7)                                                               | 82 (50.3)                           |         |
|                                     | cT3–4          | 11 (8.7)                                                                | 16 (9.8)                            |         |
| Previous biopsies                   | Biopsy naive   | 106 (83.5)                                                              | 135 (82.8)                          | 0.9     |
|                                     | Repeat biopsy  | 20 (15.7)                                                               | 28 (17.2)                           |         |

|               |            |           |           |     |
|---------------|------------|-----------|-----------|-----|
| Fusion biopsy | Yes        | 73 (57.5) | 93 (57.1) | 0.9 |
|               | No         | 54 (42.5) | 70 (42.9) |     |
| Gleason       | 6          | 12 (9.6)  | 8 (4.9)   | 0.5 |
|               | 7          | 60 (48)   | 80 (49.1) |     |
|               | 8–10       | 51 (40.8) | 73 (44.8) |     |
|               | Unknown GS | 2 (1.6)   | 2 (1.2)   |     |
